# Supplementary material for: Open-source Arduino-compatible data loggers designed for field research
Source: Copernicus journal article supplement (doi:10.5194/hess-23-2065-2019), 2019-04-24
Supplement: Supplementary file 1 [file ALog_BottleLogger_bill_of_materials.xls]

## Sheet: ALog
Digi-Key Part Number	Arrow PN	Manufacturer	Manufacturer Part Number	Part Description	Device Usage	Quantity
399-3118-1-ND		KEMET (VA)	C0603C105K8PACTU	CAP CER 1UF 10V X5R 0603	DECOUPLING VCC and VCC/CLOCK BATT, RESET	5
311-220GRCT-ND		YAGEO (VA)	RC0603JR-07220RL	RES SMD 220 OHM 5% 1/10W 0603	LED; CLOCK BACKUP BATTERY POWER SWITCHING	3
ED2735-ND		ON SHORE TECHNOLOGY INC	OSTTE100104	TERMINAL BLOCK 3.5MM 10POS PCB	SCREW TERMINAL - 10	3
445-1854-1-ND		TDK CORPORATION (VA)	CKCA43X7R1H103M100AA	CAP ARRAY 10000PF 50V X7R 1206	ADC, SD/RTC, AND VCC DECOUPLING	2
399-1055-1-ND		KEMET (VA)	C0603C330J5GACTU	CAP CER 33PF 50V NP0 0603	XTAL CAPS	2
	SSW-106-22-S-S	Samtec	SSW-106-22-S-S	CONN HEADER FEMALE 6POS .1" GOLD	REFERENCE RESISTORS - 6 PIN	2
568-5987-1-ND		NXP SEMICONDUCTORS (VA)	2N7002PW,115	MOSFET N-CH 60V 0.31A SOT323	I2C LEVEL SHIFT	2
FDN360PCT-ND		FAIRCHILD SEMICONDUCTOR (VA)	FDN360P	MOSFET P-CH 30V 2A SSOT3	HELP IN AUTOMATIC POWER SUPPLY SWITCHING	2
311-27GRCT-ND		YAGEO (VA)	RC0603JR-0727RL	RES SMD 27 OHM 5% 1/10W 0603	USB DATA I/O	2
296-24054-1-ND		Texas Instruments	TPS60150DRVR	IC REG SWTCHD CAP 5V 0.14A 6SON	5V charge pump, 5.17 until about 10ma	1
69192-406-ND	69192-406	AMPHENOL FCI	69192-406	CONN HEADER VERT DUAL 6POS	AVRISP MKII	1
A101492CT-ND		TE CONNECTIVITY AMP (VA)	2041021-4	CONN SD CARD PUSH-PULL R/A SMD	SD CARD HOLDER	1
CTX1054-ND		CTS-FREQUENCY CONTROLS	ATS08A-E	CRYSTAL 8.0000MHZ 20PF T/H	MCU OSCILLATOR	1
CV201210-100KTR-ND		Bourns Inc.	CV201210-100K	FIXED IND 10UH 150MA 360 MOHM	LOW PASS FILTER TO ADC	1
296-14529-1-ND		TEXAS INSTRUMENTS (VA)	CD74HC4050M96	IC BUFFER HEX 1INPUT 16SOIC	4050 LEVEL SHIFTER: SD	1
LTC4412ES6#TRMPBFCT-ND		LINEAR TECHNOLOGY (VA)	LTC4412ES6#TRMPBF	IC OR CTRLR SRC SELECT TSOT23-6	AUTOMATIC POWER SUPPLY SWITCHING - MAIN CHIP	1
160-1437-1-ND		LITE-ON INC (VA)	LTST-C190KSKT	LED YELLOW CLEAR 0603 SMD	RX LED	1
742C083102JPCT-ND		CTS Resistor Products	742C083102JP	RES ARRAY 4 RES 1K OHM 1206	RES ARRAY 4 RES 1K OHM 603	1
742C083332JPCT-ND		CTS Resistor Products	742C083332JP	RES ARRAY 4 RES 3.3K OHM 1206	RES ARRAY 4 RES 3.3K OHM 603	1
RMCF0603FT470KCT-ND		STACKPOLE ELECTRONICS INC (VA)	RMCF0603FT470K	RES SMD 470K OHM 1% 1/10W 0603	POWER SUPPLY SWITCHING	1
609-3657-ND		AMPHENOL FCI	61729-1011BLF	USB RCPT B-TYPE R/A FULL BACK	USB PLUG	1
576-3453-1-ND		Microchip Technology	MIC5380-SSYFT-TR	IC REG LDO 3.3V 0.15A 6TMLF	Linear Voltage Regulator Fixed 2 Output 3.3V 150mA	1
399-1096-1-ND		KEMET (VA)	C0603C104K4RACTU	CAP CER 0.1UF 16V X7R 0603	DECOUPLING (FTDI VCCIO, 328P VCC)	5
311-1451-1-ND		YAGEO (VA)	CC0603KRX5R6BB225	CAP CER 2.2UF 10V X5R 0603	LDO REGULATOR & VCC DECOUPLING	3
587-1342-1-ND		TAIYO YUDEN (VA)	LMK316BJ106KL-T	CAP CER 10UF 10V X5R 1206	USB DECOUPLING, AND BOOST CONVERTER	2
450-1650-ND		TE CONNECTIVITY ALCOSWITCH	1825910-6	SWITCH TACTILE SPST-NO 0.05A 24V	RESET & LOG BUTTONS	2
N033-ND		ENERGIZER BATTERY COMPANY	CR1220VP	BATTERY LITHIUM 3V COIN 12.5MM	COIN CELL: CLOCK BACKUP BATTERY	1
1276-6684-1-ND		Samsung Electro-Mechanics America, Inc.	CL10A475MP5LNNC	CAP CER 4.7UF 10V X5R 0603	CHARGE PUMP CAPACITOR	1
CP-202A-ND		CUI INC	PJ-202A	CONN POWER JACK 2.1MM PCB	POWER PLUG	1
ATMEGA328P-MN-ND		ATMEL	ATMEGA328P-MN	IC MCU 8BIT 32KB FLASH 32VQFN	MICROCONTROLLER CORE	1
DS3231MZ/V+-ND		MAXIM INTEGRATED	DS3231MZ/V+	IC RTC CLK/CALENDAR I2C 8-SOIC	REAL TIME CLOCK (RTC)	1
768-1155-ND		FTDI	FT231XQ-T	IC USB SERIAL FULL UART 20QFN	FTDI USB	1
LT1461CIS8-3.3#PBF-ND		Linear Technology	LT1461CIS8-3.3#PBF	IC VREF SERIES 3.3V 8SOIC	PRECISION 3.3V 100MA 0.08%, 12PPM/C	1
754-1434-1-ND		KINGBRIGHT COMPANY LLC (VA)	APT1608QBC/D	LED BLUE CLEAR 0603 SMD	TX LED	1
754-1593-ND		KINGBRIGHT COMPANY LLC	WP710A10SRD/D	LED RED DIFF 3MM ROUND T/H	FLASHING MESSAGES: INDICATOR LED	1
RMCF0603JT10K0CT-ND		STACKPOLE ELECTRONICS INC (VA)	RMCF0603JT10K0	RES SMD 10K OHM 5% 1/10W 0603	PULL UP FOR RESET	1
36-3001-ND		KEYSTONE ELECTRONICS	3001	HOLDER BATTERY COIN 12MM DIA THM	CLOCK BACKUP BATTERY HOLDER	1
BAT54C-FDICT-ND		DIODES INCORPORATED	BAT54C-7-F	DIODE ARRAY SCHOTTKY 30V SOT23-3	DIODE ARRAY FOR BATT VS REGULATOR CLOCK POWER	2
445-14081-1-ND		TDK CORPORATION (VA)	C1608NP01H470J080AA	CAP CER 47PF 50V NP0 0603	USB-SERIAL	0
490-5338-1-ND		Murata Electronics North America	LQH32PN4R7NN0L	ED IND 4.7UH 1A 180 MOHM SMD	4.7UH INDUCTOR FOR BOOST CONVERTER	0
296-39435-1-ND		Texas Instruments	TPS61222DCKR	IC REG BOOST 5V 0.2A SYNC SC70-6	3.3 TO 5V BOOST CONVERTER	0
576-1298-1-ND		TEXAS INSTRUMENTS (VA)	MIC5305-3.3YD5-TR	IC REG LDO 3.3V 0.15A SOT23-5	Linear Voltage Regulator IC Positive Fixed Output 3.3V 150mA	0
RMCF0603FT1K00CT-ND		STACKPOLE ELECTRONICS INC (VA)	RMCF0603FT1K00	RES SMD 1K OHM 1% 1/10W 0603	RX/TX RESISTORS	0
311-3.0KGRCT-ND		YAGEO (VA)	RC0603JR-073KL	RES SMD 3K OHM 5% 1/10W 0603	RTC PULL-UPS	0
401-1139-ND		C&K COMPONENTS	PVA1 OA H4 1.2N V2	SWITCH PUSH DPST-NO 0.1A 32V	MANUAL LOG BUTTON ("LOG NOW")	0
893-1181-1-ND		Torex Semiconductor Ltd	XC9140A501MR-G	IC REG BST 5V 295MA SYNC SOT-25	3.3 TO 5V BOOST CONVERTER	0
ED2746-ND		ON SHORE TECHNOLOGY INC	OSTTE040104	TERMINAL BLOCK 3.5MM 4POS PCB	SCREW TERMINAL - 4	0
ED2746-ND		ON SHORE TECHNOLOGY INC	OSTTE080104	TERMINAL BLOCK 3.5MM 8POS PCB	SCREW TERMINAL - 8	0
455-2247-ND		JST Sales America Inc.	B2B-XH-A(LF)(SN)		2 Positions Header, Shrouded Connector 0.098" (2.50mm) Through Hole Tin	1
