# Supplementary material for: Open-source Arduino-compatible data loggers designed for field research
Source: Copernicus journal article supplement (doi:10.5194/hess-23-2065-2019), 2019-04-24
Supplement: Supplementary file 1 [file hess-23-2065-2019-supplement.zip]

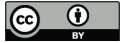

## *Supplement of*

# **Open-source Arduino-compatible data loggers designed for field research**

**Andrew D. Wickert et al.**

*Correspondence to:* Andrew D. Wickert (awickert@umn.edu)

- hess-23-2065-2019-supplement-title-page.pdf
- ALogReferenceManual.pdf
- DesignFiles\_1\_Hardware
  - ALog-BottleLogger-2.2.0
    - \* .gitignore
    - \* ALog-BottleLogger.brd
    - \* ALog-BottleLogger.sch
    - \* BoM
    - \* Gerber
    - \* LICENSE.html
    - \* README.md
  - ALog-BottleLogger-3.0.0
    - \* .gitignore
    - \* ALog-BottleLogger.brd
    - \* ALog-BottleLogger.sch
    - \* BoM
    - \* Gerber
    - \* LICENSE
    - \* LICENSE.html
    - \* README.md
  - ALog-Shield
    - \* .gitignore
    - \* ALog-Shield.brd
    - \* ALog-Shield.sch
    - \* BoM
    - \* Gerbers
    - \* LICENSE

- \* OSH\_Park\_Gerbers
  - \* README.md
- DesignFiles\_2\_FirmwareLibraries
  - ALog
    - \* .gitignore
    - \* LICENSE
    - \* README.md
    - \* doxygen\_Logger.cfg
    - \* examples
    - \* keywords.txt
    - \* library.properties
    - \* src
  - DS3231
    - \* .gitignore
    - \* DS3231.cpp
    - \* DS3231.h
    - \* LICENSE
    - \* README.md
    - \* examples
    - \* keywords.txt
    - \* library.properties
- DesignFiles\_3\_ClockSetSoftware
  - ALogTalk-master
    - \* .gitignore
    - \* ALogClockSet.py
    - \* LICENSE
    - \* Linux
    - \* LogToFile.py
    - \* PlotSensorsToScreen.py
    - \* README.md
    - \* SimpleClockSet.py
    - \* usbserial.py
  - SetTime\_GUI-master
    - \* .gitignore
    - \* ALog\_TimeSet
    - \* LICENSE
    - \* LoadedTime.png
    - \* Margay\_TimeSet
    - \* README.md
    - \* WaitingForTime.png
- Schematics\_1\_ALog-BottleLogger-2.2.0-schematic.pdf
- Schematics\_2\_ALog-BottleLogger-3.0.0-schematic.pdf
- Schematics\_3\_ALog-Shield-2.2.0-schematic.pdf

The copyright of individual parts of the supplement might differ from the CC BY 4.0 License.
