# Supplementary material for: Open-source Arduino-compatible data loggers designed for field research
Source: Copernicus journal article supplement (doi:10.5194/hess-23-2065-2019), 2019-04-24
Supplement: Supplementary file 2 [file ALog3.0.0_BoM_2019-01-12T194223.xlsx]

## Sheet: Sheet1
Index	Quantity	Part Number	Manufacturer Part Number	Description	Customer Reference	Available	Backorder	Unit Price	Extended Price USD
1	6	ED2735-ND	OSTTE100104	TERM BLK 10P SIDE ENT 3.5MM PCB		0	6	1.77	10.62
2	1	535-10212-1-ND	ABLS-8.000MHZ-B4-T	CRYSTAL 8.0000MHZ 18PF SMD		1	0	0.27	0.27
3	1	455-1749-1-ND	S2B-PH-SM4-TB(LF)(SN)	CONN HEADER SMD R/A 2POS 2MM		1	0	0.58	0.58
4	1	1276-1005-1-ND	CL10B104KO8NNNC	CAP CER 0.1UF 16V X7R 0603		1	0	0.1	0.1
5	22	1276-1005-1-ND	CL10B104KO8NNNC	CAP CER 0.1UF 16V X7R 0603		22	0	0.036	0.79
6	2	541-1.62MHCT-ND	CRCW06031M62FKEA	RES SMD 1.62M OHM 1% 1/10W 0603		2	0	0.1	0.2
7	15	311-10.0KHRCT-ND	RC0603FR-0710KL	RES SMD 10K OHM 1% 1/10W 0603		15	0	0.024	0.36
8	3	1276-2405-1-ND	CL21A106KQCLRNC	CAP CER 10UF 6.3V X5R 0805		3	0	0.11	0.33
9	1	732-11737-1-ND	78438357010	FIXED IND 1UH 7.4A 13.5MOHM SMD		1	0	1.81	1.81
10	1	CV201210-2R2KCT-ND	CV201210-2R2K	FIXED IND 2.2UH 30MA 650 MOHM		1	0	0.1	0.1
11	4	1276-6687-1-ND	CL21A226KQCLRNC	CAP CER 22UF 6.3V X5R 0805		0	4	0.17	0.68
12	2	311-27.0HRCT-ND	RC0603FR-0727RL	RES SMD 27 OHM 1% 1/10W 0603		2	0	0.1	0.2
13	3	2N7002W-FDICT-ND	2N7002W-7-F	MOSFET N-CH 60V 115MA SOT323		3	0	0.45	1.35
14	1	BAT-HLD-012-SMT-ND	BAT-HLD-012-SMT	BATTERY RETAINER COIN 12MM SMD		1	0	0.29	0.29
15	1	N033-ND	CR1220VP	BATTERY LITHIUM 3V COIN 12.5MM		1	0	0.88	0.88
16	1	732-5929-1-ND	694106106102	CONN PWR JACK 2.05X5.5MM SOLDER		1	0	1.69	1.69
17	1	ATMEGA644PA-MURCT-ND	ATMEGA644PA-MUR	IC MCU 8BIT 64KB FLASH 44VQFN		1	0	5.1	5.1
18	1	DS3231MZ+-ND	DS3231MZ+	IC RTC CLK/CALENDAR I2C 8-SOIC		1	0	7.85	7.85
19	4	FDN360PCT-ND	FDN360P	MOSFET P-CH 30V 2A SSOT3		0	4	0.55	2.2
20	1	768-1128-1-ND	FT231XQ-R	IC USB SERIAL FULL UART 20QFN		1	0	2.12	2.12
21	1	LTC2495IUHF#PBF-ND	LTC2495IUHF#PBF	IC ADC 16BIT W/PGA 38-QFN		1	0	7.18	7.18
22	1	MAX6070BAUT18+TCT-ND	MAX6070BAUT18+T	IC VREF SERIES 1.8V SOT23-6		1	0	1.94	1.94
23	1	609-4618-1-ND	10118194-0001LF	CONN RCPT USB2.0 MICRO B SMD R/A		1	0	0.45	0.45
24	2	MF-NSMF020-2CT-ND	MF-NSMF020-2	PTC RESET FUSE 24V 200MA 1206		2	0	0.49	0.98
25	2	CKN10504CT-ND	PTS810 SJG 250 SMTR LFS	SWITCH TACTILE SPST-NO 0.05A 16V		2	0	0.34	0.68
26	1	296-40841-1-ND	TPS62172QDSGRQ1	IC REG BUCK ADJ 0.5A SYNC 8WSON		1	0	1.61	1.61
27	1	296-30204-1-ND	TPS63060DSCR	IC REG BUCK BOOST ADJ 2A 10WSON		1	0	2.41	2.41
28	1	CR0603-JW-331ELFCT-ND	CR0603-JW-331ELF	RES SMD 330 OHM 5% 1/10W 0603		1	0	0.1	0.1
29	4	311-180KLDCT-ND	AC0603FR-07180KL	RES SMD 180K OHM 1% 1/10W 0603		4	0	0.1	0.4
30	1	742C083102JPCT-ND	742C083102JP	RES ARRAY 4 RES 1K OHM 1206		1	0	0.27	0.27
31	1	311-220GRCT-ND	RC0603JR-07220RL	RES SMD 220 OHM 5% 1/10W 0603		1	0	0.1	0.1
32	5	399-1055-1-ND	C0603C330J5GACTU	CAP CER 33PF 50V C0G/NP0 0603		5	0	0.19	0.95
33	1	952-2121-ND	M20-9980346	CONN HEADER VERT 6POS 2.54MM		1	0	0.24	0.24
34	1	BAT54C-FDICT-ND	BAT54C-7-F	DIODE ARRAY SCHOTTKY 30V SOT23-3		1	0	0.21	0.21
35	1	754-1434-1-ND	APT1608QBC/D	LED BLUE CLEAR CHIP SMD		1	0	0.5	0.5
36	1	A101492CT-ND	2041021-4	CONN SD CARD PUSH-PULL R/A SMD		1	0	3.69	3.69
37	1	160-1437-1-ND	LTST-C190KSKT	LED YELLOW CLEAR CHIP SMD		1	0	0.29	0.29
