# Supplementary material for: Open-source Arduino-compatible data loggers designed for field research
Source: Copernicus journal article supplement (doi:10.5194/hess-23-2065-2019), 2019-04-24
Supplement: Supplementary file 3 [file BoM_2019-01-12T185521.xlsx]

## Sheet: Sheet1
Index	Quantity	Part Number	Manufacturer Part Number	Description	Customer Reference	Available	Backorder	Unit Price	Extended Price USD
1	1	A101492CT-ND	2041021-4	CONN SD CARD PUSH-PULL R/A SMD	CONN SD CARD PUSH-PULL R/A SMD	1	0	3.69	3.69
2	1	296-14529-1-ND	CD74HC4050M96	IC BUFFER NON-INVERT 6V 16SOIC	IC BUFFER NON-INVERT 6V 16SOIC	1	0	0.46	0.46
3	5	399-1096-1-ND	C0603C104K4RACTU	CAP CER 0.1UF 16V X7R 0603	CAP CER 0.1UF 16V X7R 0603	5	0	0.16	0.8
4	1	N033-ND	CR1220VP	BATTERY LITHIUM 3V COIN 12.5MM	BATTERY LITHIUM 3V COIN 12.5MM	1	0	0.88	0.88
5	1	DS3231MZ/V+-ND	DS3231MZ/V+	IC RTC CLK/CALENDAR I2C 8-SOIC	IC RTC CLK/CALENDAR I2C 8-SOIC	1	0	7.74	7.74
6	2	RMCF0603JT10K0CT-ND	RMCF0603JT10K0	RES 10K OHM 5% 1/10W 0603	RES 10K OHM 5% 1/10W 0603	2	0	0.1	0.2
7	1	BAT54C-FDICT-ND	BAT54C-7-F	DIODE ARRAY SCHOTTKY 30V SOT23-3	DIODE ARRAY SCHOTTKY 30V SOT23-3	1	0	0.21	0.21
8	5	1276-1321-1-ND	CL03A104MP3NNNC	CAP CER 0.1UF 10V X5R 0201	CAP CER 0.1UF 10V X5R 0201	5	0	0.1	0.5
9	2	ED2742-ND	OSTTE040104	TERM BLK 4POS SIDE ENT 3.5MM PCB	Screw terminal	2	0	1.07	2.14
10	2	ED2746-ND	OSTTE080104	TERM BLK 8POS SIDE ENT 3.5MM PCB	Screw terminal	2	0	1.64	3.28
11	1	ED2741-ND	OSTTE030104	TERM BLK 3POS SIDE ENT 3.5MM PCB	Screw Terminal	1	0	0.8	0.8
12	1	BAT-HLD-012-SMT-ND	BAT-HLD-012-SMT	BATTERY RETAINER COIN 12MM SMD	Linx battery holder	1	0	0.29	0.29
13	1	1276-2405-1-ND	CL21A106KQCLRNC	CAP CER 10UF 6.3V X5R 0805	Cap 10 uF	1	0	0.11	0.11
14	1	CR0603-JW-331ELFCT-ND	CR0603-JW-331ELF	RES SMD 330 OHM 5% 1/10W 0603	R_LED	1	0	0.1	0.1
15	1	67-1003-1-ND	SML-LX1206IW-TR	LED RED DIFFUSED 1206 SMD	Indicator LED	1	0	0.44	0.44
16	2	CKN10502CT-ND	PTS810 SJM 250 SMTR LFS	SWITCH TACTILE SPST-NO 0.05A 16V	LOG NOW and RESET buttons	2	0	0.3	0.6
